# Supplementary material for: Disaggregated Sales and Stock Returns
Source: Atypon-hosted journal article supplement (doi:10.1287/mnsc.2020.3813), 2021-02-19
Supplement: mnsc.2020.3813.sm1.pdf [file mnsc.2020.3813.sm1.pdf]

INTERNET APPENDIX  
for

Disaggregated Sales and Stock Returns

## Appendix A: Variable Definitions and Constructions

### 1. Cumulative Abnormal Returns:

$CAR[+2,+61]$  is the percentage buy-and-hold cumulative abnormal return over 60 trading days after the quarterly earnings announcement. It is constructed based on the six size×B/M Fama-French portfolio benchmark. Specifically, we define the buy-and-hold  $CAR$  following Hirshleifer, Lim, and Teoh (2009).

$$CAR[+2,+61]_{in} = \prod_{j=t+2}^{t+61} (1 + R_{ij}) - \prod_{j=t+2}^{t+61} (1 + R_{pj})$$

Where  $t$  is the earnings announcement date of firm  $i$  in fiscal quarter  $n$ ;  $R_{ij}$  is the return of firm  $i$  on day  $j$  relative to the announcement day, and  $R_{pj}$  is the return of the matching size×B/M portfolio on day  $j$ . We use the nearest subsequent trading day if the earnings announcement date is a non-trading day. We accumulate the abnormal return till one day before the next earnings announcement date, if the number of trading days between two consecutive earnings announcements is less than 60 days. We require the number of days between two earnings announcement dates to be longer than 30 days but shorter than 365 days, and the number of days during reporting lag (the time after fiscal quarter end date but before earnings announcement day) to be longer than 0 day but shorter than 365 days.

Each stock is matched with one of the six size×B/M portfolios formed at the end of June each year. The *size* and *B/M* ratio for each stock used to match with the Fama-French portfolio are constructed in the same way as the Fama-French portfolio breakpoints. Specifically, *market equity* (or *size*) for a stock used to match with Fama-French portfolio in year  $y$  is the share price (CRSP variable *prc*) times shares outstanding (CRSP variable *shrout*) in the end of June of year  $y$ . The *book-to-market* ratio for a stock used to match with the Fama-French portfolio in June of year  $y$  is the *book equity* for the last fiscal year-end in  $y-1$ , divided by the *market equity* at the end of December of  $y-1$ . *Book equity* is the book value of stockholders' equity, plus balance sheet deferred taxes and investment tax credit (if available), minus the book value of preferred stock. Depending on availability, the redemption, liquidation, or par value (in that order) is used to estimate the book value of preferred stock. All definitions follow Kenneth French's website. The breakpoints of the six size×B/M portfolios, and the daily benchmark returns of the six portfolios are also obtained from Professor Kenneth French's data library.

### 2. Adjusted Spending, Earnings Surprise, and Sales Surprise:

*Adjusted Spending* ( $AdjSpend$ ) is a firm-quarter's industry-adjusted customer credit card spending. Specifically,

$$AdjSpend_{ikn} = \frac{Spending_{ikn} - Industry\ average\ spending_{ikn}}{Sale_{ikn} + 1}$$

Where  $Spending_{ikn}$  is the aggregated credit card spending in dollar for firm  $i$  from industry  $k$  within fiscal quarter  $n$ ; and  $Industry\ average\ spending_{ikn}$  is the average credit card spending for all firms in industry  $k$  during the same period. Industry is defined based on the two-digit SIC code.  $Sale_{ikn}$  is the total sales in millions of dollars for firm  $i$  from industry  $k$  within the fiscal quarter  $n$ . We scale by  $(Sale_{ikn} + 1)$  to account for zero sales cases.

*Quintile of Adjusted Spending* ( $Q\_AdjSpend$ ) is the quintile of  $AdjSpend$  sorted by every calendar quarter.  $Q\_AdjSpend$  ranges from the bottom adjusted spending quintile ( $Q\_AdjSpend=1$ ) to the top adjusted spending quintile ( $Q\_AdjSpend=5$ ).

When we test the heterogeneity by customer spending capacity and customer loyalty (Table 4), we decompose the total credit card spending into spending from customer groups split by customer characteristics, and construct adjusted spending for different customer groups separately. For example,

$$AdjSpend\_high\ spending\ capacity_{ikn} = \frac{Spending\ from\ high\ capacity\ customers_{ikn} - Industry\ average\ spending_{ikn}}{Sale_{ikn} + 1}$$

*Standardized Unexpected Earnings* ( $SUE$ ) is the standardized earnings surprise based on a rolling seasonal random walk (SRW) model following Livnat and Mendenhall (2006). Specifically,

$$SUE_{in} = \frac{EPS_{in} - EPS_{in-4}}{P_{in}}$$

Where  $EPS_{in}$  is the primary Earnings Per Share before extraordinary items for firm  $i$  in fiscal quarter  $n$ , and  $P_{in}$  is the price per share for firm  $i$  at the end of quarter  $n$ .  $EPS_{in}$  and  $P_{in}$  are unadjusted for stock splits, but  $EPS_{in-4}$  is adjusted for any stock splits and stock dividends during the period  $\{n-4, n\}$ . If most analyst forecasts of  $EPS$  for a

firm-quarter are based on diluted *EPS*, we use COMPUSTAT's diluted *EPS* figures; otherwise we use basic primary *EPS*.

**Quintile of Standardized Unexpected Earning (QSUE)** is the quintile of *SUE* sorted by every calendar quarter. *QSUE* ranges from the bottom unexpected earnings quintile (*QSUE*=1) to the top unexpected earnings quintile (*QSUE*=5).

**Standardized Unexpected Sales (SU\_Sale)** is the standardized sales surprise based on a rolling seasonal random walk (SRW) model. Specifically,

$$SU\_Sale_{in} = \frac{Sale\ per\ share_{in} - Sale\ per\ share_{in-4}}{P_{in}}$$

Where *Sale per share<sub>in</sub>* is sales per share for firm *i* in fiscal quarter *n*, and *P<sub>in</sub>* is the price per share for firm *i* at the end of quarter *n*. Sales per share is calculated by dividing quarterly sales by the number of common shares used to calculate *EPS*. If most analyst forecasts of *EPS* for a firm-quarter are based on diluted *EPS*, we divide the sales by the number of common shares used to calculate diluted *EPS*; otherwise we use the number of common shares used to calculate primary *EPS*.

**Quintile of Standardized Unexpected Sales (QSU\_Sale)** is the quintile of *SU\_Sale* sorted by every calendar quarter. *QSU\_Sale* ranges from the bottom unexpected sales quintile (*QSU\_Sale*=1) to the top unexpected sales quintile (*QSU\_Sale*=5).

### 3. Customer Characteristics:

**Total credit card spending** is the amount of total credit card spending within a fiscal quarter aggregated from credit card transactions, measured in US dollars. We only include firm-quarters that the whole fiscal-quarters are within our sample period (i.e., 1<sup>st</sup> March 2003 to 31<sup>st</sup> October 2003).

**FICO score** is the customer's FICO score, which measures his or her credit quality. Individuals with no lower than 740 quarter-beginning *FICO score* are defined as **high FICO** (hence *high spending capacity*) customers.

**Credit utilization** is the fraction of the total credit card balance out of the same-month credit limit. For individual *l* in month *t*,  $credit\ utilization_{lt} = \frac{total\ credit\ card\ balance_{lt}}{credit\ limit_{lt}}$ . Individuals with quarter-beginning *credit utilization* no higher than 30 percent are defined as **low credit utilization** (hence *high spending capacity*) customers.

**Repeat customer** is the individual who has ever purchased more than once from the same firm.

**Loyal customer** is the customer who intends to adhere to one or a few merchants to purchase a given category of goods. First, we exploit the goods type information from the Merchant Category Code in the credit card transaction record and divide the goods into nine categories: travel, transportation, supermarket, entertainment, apparel, dining, durable, service, and others. Second, for individual *l*, we calculate the *loyalty ratio* for goods category *c* = total number of category *c* goods purchases / total number of merchants that category *c* goods are purchased from during the whole sample period. We define a customer *l* as a loyal customer for a goods category *c* if the *loyalty ratio<sub>lc</sub>* is no lower than the median *loyalty ratio* for goods category *c*. Then for each merchant, if it sells goods from more than one category, we identify its major type of goods sold as the category with the largest fraction of purchase counts during the whole sample period. For a firm (mostly) selling goods category *c*, its loyal customers are the loyal customers for goods category *c*.

### 4. Firm Characteristics:

**Sales** is the total quarterly sales in millions of US dollars (COMPUSTAT variable *saleq*).

**Net income** is the total net income in millions of US dollars (COMPUSTAT variable *niq*).

**Stock price** is the quarterly close price, measured in US dollars (CRSP variable *prc*).

**Market capitalization** for a fiscal quarter is defined as the product of the share price (CRSP variable *prc*) and the total number of shares outstanding (CRSP variable *shrout*) reported in millions in fiscal quarter-end month. **Log(size)** is the log of market capitalization (in millions).

**Book equity** for a fiscal quarter is a firm's book value of equity constructed from COMPUSTAT data. It is the book value of stockholders' equity, plus balance sheet deferred taxes and investment tax credit (if available), minus the book value of preferred stock. Depending on availability, we use the redemption, liquidation, or par value (in that order) to estimate the book value of preferred stock. **B/M** for a fiscal quarter is the book-to-market ratio, calculated as book equity for the fiscal quarter end, divided by market equity at fiscal quarter-end month.

**Number of analysts** is the number of (active) analysts that have made forecasts within 90 days of the earnings announcement date. Firm-quarters with no analyst forecast during this period are assigned with 0 for this variable. **Log(number of analyst + 1)** is the log of the number of analysts that have made forecasts within 90 days before the quarterly earnings announcement date.

**Reporting lag** is the number of days between the fiscal-quarter end date and the earnings announcement date.

**Consumer-oriented firms** are firms from Transportation & Public Utilities division (two-digit SIC: 40-49), Retail Trade division (two-digit SIC: 52-59), or Service division (two-digit SIC: 70-89). The rest firms are classified as **non-consumer-oriented firms**. Please see Appendix B for the detailed classification.

**Firms relying more on direct sales** are the firms with more than half of the disaggregated sales during our sample period is classified as Wellness or Cosmetics & Personal care-related spending (identified by the Merchant Category Code in the credit card transaction record). The rest firms are classified as **firms relying less on direct sales**. Please see Appendix B for the detailed classification.

## Appendix B: Firm Classifications

We classify firms from Transportation & Public Utilities division (two-digit SIC: 40-49), Retail Trade division (two-digit SIC: 52-59), and Service division (two-digit SIC: 70-89) as consumer-oriented firms, and the rest firms as non-consumer-oriented firms. The division classification is from McKimmon Center of NCSU.

We define the firms' reliance on direct sales based on the type of goods or services they mainly sell. According to the report on the retail industry from WFDSA (2019), over 60 percent of direct sales come from two product categories: Wellness (33.2%) and Cosmetics & Personal care (31.2%). Therefore, we define a firm as relying more on direct sales if more than half of its disaggregated sales during our sample period is classified as Wellness or Cosmetics & Personal care-related spending (identified by the Merchant Category Code in the credit card transaction record); and the rest firms are classified as relying less on direct sales.

| 2-digit SIC code  | Industry                                | Division                          | No. of firms in division | Fraction of firms with high reliance on direct sales (%) |
|-------------------|-----------------------------------------|-----------------------------------|--------------------------|----------------------------------------------------------|
| Consumer-oriented |                                         |                                   |                          |                                                          |
| 40                | Railroad Transportation                 | Transportation & Public Utilities | 87                       | 5                                                        |
| 42                | Trucking & Warehousing                  |                                   |                          |                                                          |
| 44                | Water Transportation                    |                                   |                          |                                                          |
| 45                | Transportation by Air                   |                                   |                          |                                                          |
| 46                | Pipelines, Except Natural Gas           |                                   |                          |                                                          |
| 47                | Transportation Services                 |                                   |                          |                                                          |
| 48                | Communications                          |                                   |                          |                                                          |
| 49                | Electric, Gas, & Sanitary Services      | Retail Trade                      | 173                      | 8                                                        |
| 52                | Building Materials & Gardening Supplies |                                   |                          |                                                          |
| 53                | General Merchandise Stores              |                                   |                          |                                                          |
| 54                | Food Stores                             |                                   |                          |                                                          |
| 55                | Automotive Dealers & Service Stations   |                                   |                          |                                                          |
| 56                | Apparel & Accessory Stores              |                                   |                          |                                                          |
| 57                | Furniture & Home furnishings Stores     |                                   |                          |                                                          |
| 58                | Eating & Drinking Places                |                                   |                          |                                                          |
| 59                | Miscellaneous Retail                    |                                   |                          |                                                          |
| 70                | Hotels & Other Lodging Places           |                                   |                          |                                                          |
| 72                | Personal Services                       |                                   |                          |                                                          |
| 73                | Business Services                       |                                   |                          |                                                          |
| 75                | Auto Repair, Services, & Parking        |                                   |                          |                                                          |
| 78                | Motion Pictures                         |                                   |                          |                                                          |

|           |                                    |  |     |   |
|-----------|------------------------------------|--|-----|---|
| 79        | Amusement & Recreation Services    |  |     |   |
| 80        | Health Services                    |  |     |   |
| 82        | Educational Services               |  |     |   |
| 83        | Social Services                    |  |     |   |
| 87        | Engineering & Management Services  |  |     |   |
| 89        | Services, Not Elsewhere Classified |  |     |   |
| Sub total |                                    |  | 432 | 7 |

Non-consumer-oriented

|    |                                          |                                  |     |   |
|----|------------------------------------------|----------------------------------|-----|---|
| 01 | Agricultural Production - Crops          | Agriculture, Forestry, & Fishing | 2   | 0 |
| 10 | Metal, Mining                            | Mining                           | 21  | 0 |
| 12 | Coal Mining                              |                                  |     |   |
| 13 | Oil & Gas Extraction                     |                                  |     |   |
| 14 | Nonmetallic Minerals, Except Fuels       |                                  |     |   |
| 15 | General Building Contractors             | Construction                     | 12  | 0 |
| 16 | Heavy Construction, Except Building      |                                  |     |   |
| 17 | Special Trade Contractors                |                                  |     |   |
| 20 | Food & Kindred Products                  | Manufacturing                    | 276 | 6 |
| 22 | Textile Mill Products                    |                                  |     |   |
| 23 | Apparel & Other Textile Products         |                                  |     |   |
| 24 | Lumber & Wood Products                   |                                  |     |   |
| 25 | Furniture & Fixtures                     |                                  |     |   |
| 26 | Paper & Allied Products                  |                                  |     |   |
| 27 | Printing & Publishing                    |                                  |     |   |
| 28 | Chemical & Allied Products               |                                  |     |   |
| 29 | Petroleum & Coal Products                |                                  |     |   |
| 30 | Rubber & Miscellaneous Plastics Products |                                  |     |   |
| 31 | Leather & Leather Products               |                                  |     |   |
| 32 | Stone, Clay, & Glass Products            |                                  |     |   |
| 33 | Primary Metal Industries                 |                                  |     |   |
| 34 | Fabricated Metal Products                |                                  |     |   |
| 35 | Industrial Machinery & Equipment         |                                  |     |   |
| 36 | Electronic & Other Electric Equipment    |                                  |     |   |

|           |                                        |                                   |     |   |
|-----------|----------------------------------------|-----------------------------------|-----|---|
| 37        | Transportation Equipment               |                                   |     |   |
| 38        | Instruments & Related Products         |                                   |     |   |
| 39        | Miscellaneous Manufacturing Industries |                                   |     |   |
| 50        | Wholesale Trade - Durable Goods        | Wholesale Trade                   | 34  | 0 |
| 51        | Wholesale Trade - Nondurable Goods     |                                   |     |   |
| 60        | Depository Institutions                | Finance, Insurance, & Real Estate | 80  | 4 |
| 61        | Nondepository Institutions             |                                   |     |   |
| 62        | Security & Commodity Brokers           |                                   |     |   |
| 63        | Insurance Carriers                     |                                   |     |   |
| 64        | Insurance Agents, Brokers, & Service   |                                   |     |   |
| 65        | Real Estate                            |                                   |     |   |
| 67        | Holding & Other Investment Offices     |                                   |     |   |
| 95        | Environmental Quality & Housing        | Public Administration             | 1   | 0 |
| Sub total |                                        |                                   | 426 | 5 |
| Total     |                                        |                                   | 858 | 6 |

---

**Figure IA1. Random Match between Adjusted Spending and Firm-quarters**

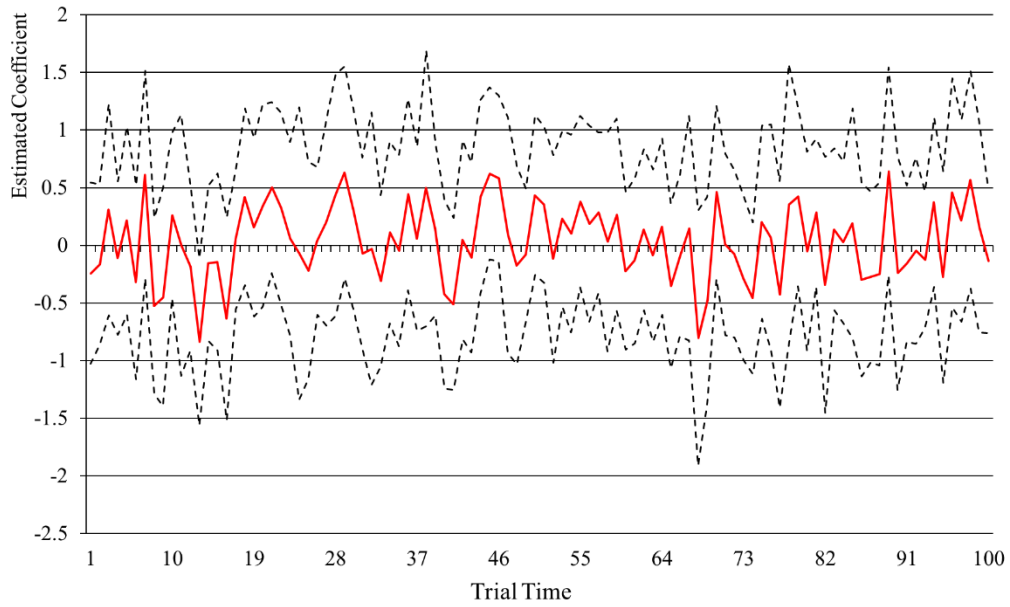

**Note.** This figure plots the coefficients and 95% confidence intervals for  $Q\_AdjSpend$  from the main regression, when the  $Q\_AdjSpend$  is randomly assigned to an arbitrary firm-quarter in the sample. The random match is replicated for 100 times. The horizontal axis is the time of the random match, and the vertical axis is the magnitude of the regression coefficient for  $Q\_AdjSpend$ . For detailed variable definitions and constructions, please see Appendix A in the Internet Appendix.

**Table IA1. Aggregated Sales and Credit Card Spending within Industry**

| <b>Panel A. Distribution of the difference: sales fraction – spending fraction within industry</b> |           |               |        |                    |
|----------------------------------------------------------------------------------------------------|-----------|---------------|--------|--------------------|
| Mean                                                                                               | Std. dev. | 25 percentile | Median | 75 percentile      |
| (1)                                                                                                | (2)       | (3)           | (4)    | (5)                |
| 0.000                                                                                              | 0.147     | -0.026        | -0.003 | 0.012              |
| <b>Panel B. Exclude firm-quarters with  sales fraction – spending fraction &gt;10%</b>             |           |               |        |                    |
|                                                                                                    |           |               |        | CAR[+2,+61]<br>(1) |
| Q_AdjSpend                                                                                         |           |               |        | 1.778***<br>(3.94) |
| QSUE                                                                                               |           |               |        | 2.648***<br>(4.65) |
| QSU_Sale                                                                                           |           |               |        | -0.128<br>(0.32)   |
| Firm characteristics controls                                                                      |           |               |        | Y                  |
| Industry FE                                                                                        |           |               |        | Y                  |
| Year-quarter FE                                                                                    |           |               |        | Y                  |
| Observations                                                                                       |           |               |        | 1,184              |
| R-squared                                                                                          |           |               |        | 0.14               |

**Note.** This table investigates the difference between firm-quarters’ sales fraction and customer spending fraction within industry in our sample. *Sales fraction* is the firm-quarter’s reported sales scaled by total reported sales from all same-industry firms in the same calendar quarter in our sample. *Spending fraction* is the firm-quarter’s customer credit card spending scaled by total customer credit card spending from all same-industry firms in the same calendar quarter in our sample. In Panel A, we report the distribution of the difference between *sales fraction* and *spending fraction*. In Panel B, we estimate our main result after excluding firm-quarters with over 10 percent of difference in *sales fraction* and *spending fraction*. All CARs are measured in percentage. Coefficients for other control variables and constant term are omitted. For detailed variable definitions and constructions, please see Appendix A in the Internet Appendix. Industry and year-quarter fixed effects are included. Standard errors are clustered at the two-digit industry level. t-statistics are reported in parentheses. \*\*\* indicates significant at 1 percent, \*\* indicates significant at 5 percent, and \* indicates significant at 10 percent respectively.

**Table IA2. Heterogeneous Effect by Fraction of Sales to Consumers**

|                               | CAR[+2,+61]                                |                                           |
|-------------------------------|--------------------------------------------|-------------------------------------------|
|                               | High fraction of sales to consumers<br>(1) | Low fraction of sales to consumers<br>(2) |
| Q_AdjSpend                    | 1.739***<br>(3.80)                         | 0.737<br>(0.93)                           |
| QSUE                          | 2.866***<br>(4.44)                         | 1.861**<br>(2.61)                         |
| QSU_Sale                      | -0.772<br>(1.60)                           | 0.284<br>(0.45)                           |
| Firm characteristics controls | Y                                          | Y                                         |
| Industry FE                   | Y                                          | Y                                         |
| Year-quarter FE               | Y                                          | Y                                         |
| Observations                  | 888                                        | 584                                       |
| R-squared                     | 0.15                                       | 0.12                                      |

**Note.** This table presents the heterogeneous effect under an alternative classification criterion for consumer-oriented firms. We report the average effect in consumer-oriented firms (column (1)) and non-consumer-oriented firms (columns (2)) under the alternative definition respectively. Specifically, we compute the fraction of credit card sales out of the reported sales for each firm quarter. Firms in industries with median fraction of sales to consumers higher than the 50th percentile among all industries in the sample are classified as consumer-oriented firms, and firms in the rest industries as non-consumer-oriented firms. For other detailed variable definitions and constructions, please see Appendix A in the Internet Appendix. Industry and year-quarter fixed effects are included. All CARs are measured in percentage. Coefficients for other control variables and constant term are omitted. Standard errors are clustered at the two-digit industry level. t-statistics are reported in parentheses. \*\*\* indicates significant at 1 percent, \*\* indicates significant at 5 percent, and \* indicates significant at 10 percent respectively.

**Table IA3. Do Customer Spending Capacity Measures Predict Future Purchases?**

|                        | Repeat customer (dummy) |                    | Repeat purchase amount (\$) |                    |
|------------------------|-------------------------|--------------------|-----------------------------|--------------------|
|                        | FICO score              | Credit utilization | FICO score                  | Credit utilization |
|                        | (1)                     | (2)                | (3)                         | (4)                |
| High spending capacity | 0.046***<br>(22.33)     | 0.019***<br>(8.86) | 25.527***<br>(7.17)         | 6.159**<br>(2.47)  |
| Firm FE                | Y                       | Y                  | Y                           | Y                  |
| Observations           | 331,241                 | 340,930            | 141,176                     | 144,337            |
| R-squared              | 0.09                    | 0.09               | 0.17                        | 0.17               |

**Note.** This table investigates the relation between customer spending capacity proxies and repeat purchase behaviors. Each customer in the sample is classified as with *high spending capacity* or *low spending capacity* according to the spending capacity characteristics (sample-beginning *FICO score* and *credit utilization*). *Repeat customer* for a firm is the individual who has purchased more than once from this firm. *Repeat purchase amount* for a firm is the total dollar amount for the repurchase transactions at the firm from each *repeat customer*. Columns (1)-(2) report the extensive margin effect; and columns (3)-(4) report the intensive margin effect. *High spending capacity* is a dummy equal to 1 for customers with high spending capacity. For detailed variable definitions and constructions, please see Appendix A in the Internet Appendix. Firm fixed effect is included, and standard errors are clustered at the firm level. Coefficients for the constant term are omitted. t-statistics are reported in parentheses. \*\*\* indicates significant at 1 percent, \*\* indicates significant at 5 percent, and \* indicates significant at 10 percent respectively.

**Table IA4. Heterogeneity by Customer Spending Capacity (Alternative Measures)**

|                                   | CAR[+2,+61]           |                    |
|-----------------------------------|-----------------------|--------------------|
|                                   | Behavior score<br>(1) | Delinquency<br>(2) |
| Q_AdjSpend_high spending capacity | 1.509**<br>(2.11)     | 1.483***<br>(3.48) |
| Q_AdjSpend_low spending capacity  | 0.747<br>(0.86)       | 0.376<br>(0.37)    |
| Surprise controls                 | Y                     | Y                  |
| Firm characteristics controls     | Y                     | Y                  |
| Industry FE                       | Y                     | Y                  |
| Year-quarter FE                   | Y                     | Y                  |
| Observations                      | 1,438                 | 1,439              |
| R-squared                         | 0.12                  | 0.12               |

**Note.** This table presents the return predictability of the adjusted spending from the firm's customer groups with high and low spending capacity separately, under two alternative measures of consumer credit and liquidity status. We define high-spending-capacity customers as individuals with top tercile quarter-beginning *internal behavior score* (column (1)), or the individual who has never been delinquent during the whole sample period (column (2)). *Internal behavior score* is an internal-generated credit quality score for a credit card holder; a higher *internal behavior score* indicates better credit quality. Total credit card spending in each firm-quarter is decomposed into the amount from high spending capacity customers and low spending capacity customers respectively. *Q\_AdjSpend\_high spending capacity* is the quintile of adjusted spending from high spending capacity customers. *Q\_AdjSpend\_low spending capacity* is the quintile of adjusted spending from low spending capacity customers. All CARs are measured in percentage. Coefficients for other control variables and constant term are omitted. For detailed variable definitions and constructions, please see Appendix A in the Internet Appendix. Industry and year-quarter fixed effects are included. Standard errors are clustered at the two-digit industry level. t-statistics are reported in parentheses. \*\*\* indicates significant at 1 percent, \*\* indicates significant at 5 percent, and \* indicates significant at 10 percent respectively.

**Table IA5. Heterogeneity by Customer Base**

| <b>Panel A. Customer age diversity</b>      |                                   |                                  |
|---------------------------------------------|-----------------------------------|----------------------------------|
|                                             | CAR[+2,+61]                       |                                  |
|                                             | High age diversity<br>(1)         | Low age diversity<br>(2)         |
| Q_AdjSpend                                  | 2.324***<br>(2.91)                | 0.794<br>(0.98)                  |
| QSUE                                        | 2.228***<br>(3.18)                | 2.526***<br>(3.16)               |
| QSU_Sale                                    | -0.866<br>(1.55)                  | 0.033<br>(0.05)                  |
| Firm characteristics controls               | Y                                 | Y                                |
| Industry FE                                 | Y                                 | Y                                |
| Year-quarter FE                             | Y                                 | Y                                |
| Observations                                | 717                               | 714                              |
| R-squared                                   | 0.17                              | 0.17                             |
| <b>Panel B. Customer regional diversity</b> |                                   |                                  |
|                                             | CAR[+2,+61]                       |                                  |
|                                             | High regional diversity<br>(1)    | Low regional diversity<br>(2)    |
| Q_AdjSpend                                  | 2.370***<br>(3.25)                | 0.819<br>(1.22)                  |
| QSUE                                        | 1.858***<br>(3.13)                | 3.026***<br>(3.94)               |
| QSU_Sale                                    | -0.710<br>(1.25)                  | -0.079<br>(0.13)                 |
| Firm characteristics controls               | Y                                 | Y                                |
| Industry FE                                 | Y                                 | Y                                |
| Year-quarter FE                             | Y                                 | Y                                |
| Observations                                | 716                               | 716                              |
| R-squared                                   | 0.17                              | 0.17                             |
| <b>Panel C. Rural-urban diversity</b>       |                                   |                                  |
|                                             | CAR[+2,+61]                       |                                  |
|                                             | High rural-urban diversity<br>(1) | Low rural-urban diversity<br>(2) |
| Q_AdjSpend                                  | 2.329***<br>(3.09)                | 0.668<br>(0.69)                  |
| QSUE                                        | 1.547**<br>(2.20)                 | 3.183***<br>(4.01)               |
| QSU_Sale                                    | -0.364<br>(0.75)                  | -0.222<br>(0.33)                 |
| Firm characteristics controls               | Y                                 | Y                                |
| Industry FE                                 | Y                                 | Y                                |
| Year-quarter FE                             | Y                                 | Y                                |
| Observations                                | 714                               | 712                              |
| R-squared                                   | 0.15                              | 0.18                             |

**Note.** This table presents the heterogeneous return predictability of the adjusted spending by the firm's customer base diversity. Panel A investigates the heterogeneity by the firm's customer age diversity. Firm-quarters with lower-than-median *HHI age* from three age groups (i.e., young ( $\text{age} < 30$ ), middle-age ( $30 \leq \text{age} < 60$ ), and old ( $\text{age} \geq 60$ )) are defined as diversified. Column (1) reports the regression results for firm-quarters with consumption from diversified customer age groups; and column (2) reports the regression results for firm-quarters with consumption from concentrated customer age groups. Panel B reports the heterogeneity by customer regional diversity. Firm-quarters with lower-than-median *HHI region* from five regional groups (i.e., Midwest, Northeast, West, South, and other) are defined as diversified. Column (1) reports the regression results for firm-quarters with regionally diversified consumption; and column (2) reports the regression results for firm-quarters with regionally concentrated consumption. Panel C reports the heterogeneity by customer rural-urban diversity. Firm-quarters with lower-than-median *HHI rural-urban* from rural and urban customers are defined as diversified. Column (1) reports the regression results for firm-quarters with diversified rural-urban consumption; and column (2) reports the regression results for firm-quarters with concentrated rural-urban consumption. Quintile ranking of *AdjSpend*, *SUE*, and *SU\_Sale* are all based on independent sorts in each calendar quarter. All *CARs* are measured in percentage. Coefficients for other control variables and constant term are omitted. For detailed variable definitions and constructions, please see Appendix A in the Internet Appendix. Industry and year-quarter fixed effects are included. Standard errors are clustered at the two-digit industry level. t-statistics are reported in parentheses. \*\*\* indicates significant at 1 percent, \*\* indicates significant at 5 percent, and \* indicates significant at 10 percent respectively.

**Table IA6. Predicting Future Earnings and Sales Surprises**

|                               | <i>QSUE</i> in quarter |                     | <i>QSU_Sale</i> in quarter |                    |
|-------------------------------|------------------------|---------------------|----------------------------|--------------------|
|                               | <i>n</i> +1<br>(1)     | <i>n</i> +4<br>(2)  | <i>n</i> +1<br>(3)         | <i>n</i> +4<br>(4) |
| <i>Q_AdjSpend</i>             | 0.026<br>(0.82)        | 0.085**<br>(2.34)   | 0.058**<br>(2.11)          | 0.067**<br>(2.17)  |
| <i>QSUE</i>                   | 0.328***<br>(9.60)     | -0.158***<br>(3.62) | -0.044*<br>(1.91)          | -0.043<br>(1.45)   |
| <i>QSU_Sale</i>               | 0.025<br>(1.08)        | 0.003<br>(0.08)     | 0.617***<br>(22.62)        | 0.024<br>(0.56)    |
| Firm characteristics controls | Y                      | Y                   | Y                          | Y                  |
| Industry FE                   | Y                      | Y                   | Y                          | Y                  |
| Year-quarter FE               | Y                      | Y                   | Y                          | Y                  |
| Observations                  | 1,482                  | 1,404               | 1,482                      | 1,404              |
| R-squared                     | 0.24                   | 0.14                | 0.45                       | 0.16               |

**Note.** This table presents the predictability of the firm's adjusted spending on its future earnings and sales surprises. We construct earnings surprise (sales surprise) in future quarters as the change of *EPS* (*Sales per share*) scaled by price in quarter *n* to avoid the contamination of changing price caused by adjusted spending. For example, the *SUE* in quarter *n*+1 is  $SUE_{in+1} = \frac{EPS_{in+1} - EPS_{in-3}}{P_{in}}$ . Columns (1)–(2) report the predictive power of adjusted spending quintiles in quarter *n* for earnings surprise quintiles in quarter *n*+1 and *n*+4 respectively. Columns (3)–(4) report the predictive power of adjusted spending quintiles in quarter *n* for sales surprise quintiles in quarter *n*+1 and *n*+4 respectively. *Q\_AdjSpend* is quintiles of adjusted spending. *QSUE* is quintile of earnings surprise. *QSU\_Sale* is quintile of sales surprise. Quintile ranking of *AdjSpend*, *SUE*, and *SU\_Sale* are all based on independent sorts in each calendar quarter. All *CARs* are measured in percentage. Coefficients for other control variables and constant term are omitted. For detailed variable definitions and constructions, please see Appendix A in the Internet Appendix. Industry and year-quarter fixed effects are included. Standard errors are clustered at the two-digit industry level. t-statistics are reported in parentheses. \*\*\* indicates significant at 1 percent, \*\* indicates significant at 5 percent, and \* indicates significant at 10 percent respectively.

**Table IA7. Alternative Explanations**

|                               | CAR[+2,+61]          |                         |                      |
|-------------------------------|----------------------|-------------------------|----------------------|
|                               | Earnings quality     | Institutional ownership | Investor distraction |
|                               | (1)                  | (2)                     | (3)                  |
| Q_AdjSpend                    | 1.309***<br>(3.04)   | 1.615***<br>(4.06)      | 1.490***<br>(3.71)   |
| QSUE                          | 2.567***<br>(4.96)   | 2.418***<br>(4.78)      | 2.462***<br>(4.73)   |
| QSU_Sale                      | -0.339<br>(0.84)     | -0.322<br>(0.78)        | -0.316<br>(0.77)     |
| Earnings persistence          | -2.963***<br>(2.83)  |                         |                      |
| Earnings volatility           | -0.000***<br>(11.35) |                         |                      |
| Institutional ownership       |                      | -3.839**<br>(2.08)      |                      |
| Number of concurrent EA       |                      |                         | -0.001<br>(-0.15)    |
| Firm characteristics controls | Y                    | Y                       | Y                    |
| Industry FE                   | Y                    | Y                       | Y                    |
| Year-quarter FE               | Y                    | Y                       | Y                    |
| Observations                  | 1,415                | 1,465                   | 1,472                |
| R-squared                     | 0.14                 | 0.13                    | 0.13                 |

**Note.** This table presents the test results for alternative explanations by controlling for three factors associated with the *Post-Earnings-Announcement-Drift*: earnings quality, institutional ownership, and investor distraction. Column (1) adds two earnings properties—*earnings persistence* and *earnings volatility*—as additional controls. *Earnings persistence* is the coefficient estimation of quarterly *EPS* regressed on the *EPS* in the same quarter last year (using the past four years of data to run the regression). *Earnings volatility* is the standard deviation during the preceding four years for the deviations of quarterly earnings from one-year-ago earnings. Column (2) adds firm-quarter's percentage of institutional ownership (*institutional ownership*) by the ending month of each fiscal quarter as additional control. Column (3) adds the number of concurrent earnings announcements on the same date (*number of concurrent EA*) for a firm-quarter as an additional control. Quintile ranking of *AdjSpend*, *SUE*, and *SU\_Sale* are all based on independent sorts in each calendar quarter. All *CARs* are measured in percentage. Coefficients for other control variables and constant term are omitted. For detailed variable definitions and constructions, please see Appendix A in the Internet Appendix. Industry and year-quarter fixed effects are included. Standard errors are clustered at the two-digit industry level. t-statistics are reported in parentheses. \*\*\* indicates significant at 1 percent, \*\* indicates significant at 5 percent, and \* indicates significant at 10 percent respectively.

**Table IA8. Post-announcement Return Predictability of Earnings Surprise**

| <b>Panel A. Firms in sample vs. firms not in sample, 1980-2003</b>     |                  |                        |                            |                           |
|------------------------------------------------------------------------|------------------|------------------------|----------------------------|---------------------------|
|                                                                        | All firms<br>(1) | Firms in sample<br>(2) | Firms not in sample<br>(3) | Difference (2)-(3)<br>(4) |
| ↑ in $CAR_{[+2,+61]}$ when 1 inter-quintile ↑ in $SUE$                 | 1.3%             | 1.4%                   | 1.3%                       | 0.1%                      |
| <b>Panel B. Sample period (2003 Q2-Q3) vs. other period, 1980-2003</b> |                  |                        |                            |                           |
|                                                                        | All firms<br>(1) | Firms in sample<br>(2) | Firms not in sample<br>(3) | Difference (2)-(3)<br>(4) |
| ↑ in $CAR_{[+2,+61]}$ when 1 inter-quintile ↑ in $SUE$                 |                  |                        |                            |                           |
| (a) During 2003Q2-Q3                                                   | 2.3%             | 2.7%                   | 2.2%                       | 0.5%                      |
| (b) During other time in 1980-2003                                     | 1.2%             | 1.3%                   | 1.2%                       | 0.1%                      |
| Difference (a)-(b)                                                     | 1.1%***          | 1.4%**                 | 1.0%***                    | 0.4%                      |

**Note.** This table presents the return predictability of the earnings surprise during the 60-day post-announcement period. In Panel A, we extend the time period to all quarters in 1980-2003, and check the return predictability of  $SUE$  for firms in sample and firms not in sample separately. In Panel B, we further divide the time period into sample period (2003 Q2-Q3) and other period, and check the return predictability of  $SUE$  for firms in sample and firms not in the sample during the two periods separately. Column (1) reports the effects for all firms together; columns (2) and (3) report the effects for firms in sample and not in sample respectively; and column (4) report the difference in effects between firms in sample and firms not in the sample.  $QSUE$  is quintile of earnings surprise ( $QSUE=1$ : bad earnings news,  $QSUE=5$ : good earnings news). Quintile ranking of  $SUE$  is based on independent sorts in each calendar quarter. For detailed variable definitions and constructions, please see Appendix A in the Internet Appendix. \*\*\* indicates significant at 1 percent, \*\* indicates significant at 5 percent, and \* indicates significant at 10 percent respectively.

**Table IA9. Robustness Tests**

|                               | CAR[+2,+61]                                    |                                                               |                                             |                                          |
|-------------------------------|------------------------------------------------|---------------------------------------------------------------|---------------------------------------------|------------------------------------------|
|                               | Industry-adjusted sales<br>and earnings<br>(1) | Change in sales and earnings proportion<br>in industry<br>(2) | Analyst forecast based<br><i>SUE</i><br>(3) | Asset-scaled adjusted<br>spending<br>(4) |
| Q_AdjSpend                    | 1.253***<br>(2.99)                             | 1.345***<br>(3.27)                                            | 2.373***<br>(4.16)                          | 1.656***<br>(4.74)                       |
| Q_AdjSpend_asset              |                                                |                                                               |                                             |                                          |
| Q_AdjEarning                  | 0.707<br>(1.27)                                |                                                               |                                             |                                          |
| Q_ChgEarningProp              |                                                | -0.033<br>(0.05)                                              |                                             |                                          |
| QSUE_af                       |                                                |                                                               | 0.266<br>(0.53)                             |                                          |
| QSUE                          |                                                |                                                               |                                             | 2.469***<br>(4.78)                       |
| Q_AdjSale                     | 0.322<br>(0.31)                                |                                                               |                                             |                                          |
| Q_ChgSaleProp                 |                                                | 0.281<br>(0.70)                                               |                                             |                                          |
| QSU_Sale                      |                                                |                                                               | -0.199<br>(0.34)                            | -0.267<br>(0.65)                         |
| Firm characteristics controls | Y                                              | Y                                                             | Y                                           | Y                                        |
| Industry FE                   | Y                                              | Y                                                             | Y                                           | Y                                        |
| Year-quarter FE               | Y                                              | Y                                                             | Y                                           | Y                                        |
| Observations                  | 1,472                                          | 1,472                                                         | 959                                         | 1,472                                    |
| R-squared                     | 0.11                                           | 0.11                                                          | 0.16                                        | 0.13                                     |

---

**Panel B. Alternative benchmarks for CARs**

|                               | CAR[+2,+61]                                          |                                        |                                                           |
|-------------------------------|------------------------------------------------------|----------------------------------------|-----------------------------------------------------------|
|                               | 25 size × B/M Fama-French portfolio<br>return<br>(1) | Value-weighted market<br>return<br>(2) | 125 size × B/M × Momentum DGTW portfolio<br>return<br>(3) |
| Q_AdjSpend                    | 1.407***<br>(3.56)                                   | 1.572***<br>(3.93)                     | 0.871**<br>(2.57)                                         |
| QSUE                          | 2.336***<br>(4.34)                                   | 2.367***<br>(4.57)                     | 2.653***<br>(4.97)                                        |
| QSU_Sale                      | -0.205<br>(0.50)                                     | -0.350<br>(0.85)                       | -0.016<br>(0.04)                                          |
| Firm characteristics controls | Y                                                    | Y                                      | Y                                                         |
| Industry FE                   | Y                                                    | Y                                      | Y                                                         |
| Year-quarter FE               | Y                                                    | Y                                      | Y                                                         |
| Observations                  | 1,471                                                | 1,486                                  | 1,306                                                     |
| R-squared                     | 0.11                                                 | 0.16                                   | 0.13                                                      |

**Panel C. Alternative industry classifications**

|                               | CAR[+2,+61]                        |                               |
|-------------------------------|------------------------------------|-------------------------------|
|                               | Fama-French 48 industry (2)<br>(1) | 3-digit NAICS industry<br>(2) |
| Q_AdjSpend                    | 1.483***<br>(2.90)                 | 1.538***<br>(3.57)            |
| QSUE                          | 2.392***<br>(6.00)                 | 2.291***<br>(3.43)            |
| QSU_Sale                      | -0.268<br>(0.69)                   | -0.287<br>(0.62)              |
| Firm characteristics controls | Y                                  | Y                             |
| Industry FE                   | Y                                  | Y                             |
| Year-quarter FE               | Y                                  | Y                             |
| Observations                  | 1,461                              | 1,457                         |
| R-squared                     | 0.12                               | 0.13                          |

---

**Note.** This table presents three sets of robustness tests. In panel A, we consider alternative specifications regarding sales surprise, earnings surprise, and adjusted spending. In column (1), we replace quintile of sales (earnings) surprise with quintile of industry-adjusted sales (earnings):  $Q\_AdjSale$  ( $Q\_AdjEarning$ ), where  $AdjSale_{ikn} = \frac{Sale_{ikn} - Industry\ average\ sale_{ikn}}{Sale_{ikn+1}}$ , and  $AdjEarning_{ikn} = \frac{NI_{ikn} - Industry\ average\ NI_{ikn}}{NI_{ikn+1}}$ . In column (2), we replace quintile of sales (earnings) surprise with quintile of change in sales (earnings) as a fraction of the industry's total sales (earnings) from the same quarter of last year:  $Q\_ChgSaleProp$  ( $Q\_ChgEarningProp$ ), where  $ChgSaleProp_{ikn} = \frac{Sales_{ikn}}{Industry\ total\ sales_{kn}} - \frac{Sales_{ikn-4}}{Industry\ total\ sales_{kn-4}}$ , and  $ChgEarningProp_{ikn} = \frac{NI_{ikn}}{Industry\ total\ NI_{kn}} - \frac{NI_{ikn-4}}{Industry\ total\ NI_{kn-4}}$ . In column (3), we replace  $QSUE$  with analyst forecast based earnings surprise:  $QSUE_{af}$ , where  $SUE_{afin} = \frac{EPS_{in} - EPS_{AFin}}{P_{in}}$ , and  $EPS_{AFin}$  is the median of analysts' most recent earnings forecasts reported to I/B/E/S in the 90 days before the earnings announcement day. In column (4), we define the adjusted customer spending as  $AdjSpend\_asset_{ikn} = \frac{Spending_{ikn} - Industry\ average\ spending_{ikn}}{Total\ asset_{ikn}}$ , and investigate the effect of  $Q\_AdjSpend\_asset$ . In Panel B, we replicate the main results in Table 2 using three alternative benchmark portfolio returns to calculate  $CAR$ . Columns (1)-(3) use the benchmark returns as 25 size×B/M Fama-French portfolio returns, value-weighted market returns, and 125 size×B/M×Momentum DGTW portfolio returns respectively (Daniel, Grinblatt, Titman, and Wermers, 1997; Wermers, 2004). In Panel C, we replicate the main results in Table 2 using two alternative industry classifications: Fama-French 48 industry (column (1)) and 3-digit NAICS industry (column (2)). Industry and year-quarter fixed effects are included. Coefficients for other control variables and constant term are omitted. Standard errors are clustered at the two-digit industry level. t-statistics are reported in parentheses. \*\*\* indicates significant at 1 percent, \*\* indicates significant at 5 percent, and \* indicates significant at 10 percent respectively.

**Table IA10. Bootstrap Standard Error Estimation**

|                               | CAR[+2,+61]<br>(1) |
|-------------------------------|--------------------|
| Q_AdjSpend                    | 1.490***<br>(3.73) |
| QSUE                          | 2.465***<br>(4.80) |
| QSU_Sale                      | -0.320<br>(0.78)   |
| Firm characteristics controls | Y                  |
| Industry FE                   | Y                  |
| Year-quarter FE               | Y                  |
| Observations                  | 1,472              |
| R-squared                     | 0.13               |

**Note.** This table presents the effect of adjusted spending on subsequent *CAR* when standard errors for regression are estimated by bootstrapping for 500 times. Quintile ranking of *AdjSpend*, *SUE*, and *SU\_Sale* are all based on independent sorts in each calendar quarter. For detailed variable definitions and constructions, please see Appendix A in the Internet Appendix. All *CARs* are measured in percentage. Coefficients for other control variables and constant term are omitted. Industry and year-quarter fixed effects are included, and standard errors are generated by bootstrap. t-statistics are reported in parentheses. \*\*\* indicates significant at 1 percent, \*\* indicates significant at 5 percent, and \* indicates significant at 10 percent respectively.

**Table IA11. Account for Industry-level Variations**

| <b>Panel A. Exclude industries with less than N firms</b> |                    |                    |                    |                    |
|-----------------------------------------------------------|--------------------|--------------------|--------------------|--------------------|
|                                                           | CAR[+2,+61]        |                    |                    |                    |
|                                                           | N=3                | N=5                | N=10               | N=20               |
|                                                           | (1)                | (2)                | (3)                | (4)                |
| Q_AdjSpend                                                | 1.522***<br>(3.77) | 1.464***<br>(3.67) | 1.681***<br>(4.72) | 1.575***<br>(4.08) |
| QSUE                                                      | 2.470***<br>(4.81) | 2.534***<br>(4.87) | 2.535***<br>(4.80) | 2.361***<br>(3.99) |
| QSU_Sale                                                  | -0.305<br>(0.75)   | -0.245<br>(0.61)   | -0.260<br>(0.66)   | -0.623<br>(1.62)   |
| Firm characteristics controls                             | Y                  | Y                  | Y                  | Y                  |
| Industry FE                                               | Y                  | Y                  | Y                  | Y                  |
| Year-quarter FE                                           | Y                  | Y                  | Y                  | Y                  |
| Observations                                              | 1,453              | 1,402              | 1,196              | 887                |
| R-squared                                                 | 0.12               | 0.12               | 0.12               | 0.11               |
| <b>Panel B: Control for firm size within industry</b>     |                    |                    |                    |                    |
|                                                           | CAR[+2,+61]        |                    |                    |                    |
|                                                           | (1)                | (2)                |                    |                    |
| Q_AdjSpend                                                |                    | 1.488***<br>(3.74) |                    |                    |
| Q_ResSpend                                                |                    |                    | 1.291***<br>(3.78) |                    |
| QSUE                                                      |                    | 2.466***<br>(4.83) | 2.414***<br>(4.65) |                    |
| QSU_Sale                                                  |                    | -0.320<br>(0.79)   | -0.283<br>(0.70)   |                    |
| IndRank_size                                              |                    | 0.005<br>(0.06)    |                    |                    |
| Firm characteristics controls                             |                    | Y                  | Y                  |                    |
| Industry FE                                               |                    | Y                  | Y                  |                    |
| Year-quarter FE                                           |                    | Y                  | Y                  |                    |
| Observations                                              |                    | 1,472              | 1,472              |                    |
| R-squared                                                 |                    | 0.13               | 0.13               |                    |

---

**Panel C. Control for industry average CAR[+2,+61]**

|                               | CAR[+2,+61]<br>(1) |
|-------------------------------|--------------------|
| Q_AdjSpend                    | 1.460***<br>(3.67) |
| QSUE                          | 2.490***<br>(4.90) |
| QSU_Sale                      | -0.248<br>(0.59)   |
| Industry Average CAR[+2,+61]  | 0.927***<br>(6.55) |
| Firm characteristics controls | Y                  |
| Industry FE                   | Y                  |
| Year-quarter FE               | Y                  |
| Observations                  | 1,472              |
| R-squared                     | 0.16               |

---

**Note.** This table presents the effect of adjusted spending on post-announcement *CAR* after accounting for industry-level variations. Panel A excludes industries with less than *X* firms, with *X* being 3, 5, 10 or 20 in columns (1)-(4). Panel B controls for within-industry size difference of firms. Column (1) additionally controls for the rank of quarter-end firm size within the industry (*IndRank\_size*) for each quarter in the regression. Column (2) replaces the quintile of *adjusted spending* with the quintile of a *residualized spending* measure orthogonal to the firm size. Specifically, we regress the deviation of customer spending from industry mean (i.e., the numerator for *AdjSpend* measure) on the quarter-end *size* for each firm-quarter and take the regression residual as *residualized spending*. Panel C includes the industry average *CAR* during the [+2,+61] trading day period after each firm-quarter's earnings announcement in the regression. Quintile ranking of *AdjSpend*, *residualized spending*, *SUE*, and *SU\_Sale* are all based on independent sorts in each calendar quarter. For detailed variable definitions and constructions, please see Appendix A in the Internet Appendix. All *CAR*s are measured in percentage. Coefficients for other control variables and constant term are omitted. Industry and year-quarter fixed effects are included, and standard errors are clustered at the two-digit industry level. t-statistics are reported in parentheses. \*\*\* indicates significant at 1 percent, \*\* indicates significant at 5 percent, and \* indicates significant at 10 percent respectively.

## **References**

Daniel, Kent, Mark Grinblatt, Sheridan Titman, and Russ Wermers. 1997. "Measuring Mutual Fund Performance with Characteristic-Based Benchmarks." *The Journal of Finance* 52(3): 1035-1058.

Wermers, Russ, 2004. "Is Money Really 'Smart'? New Evidence on the Relation Between Mutual Fund Flows, Manager Behavior, and Performance Persistence." Working paper.
